# Supplementary material for: Core–shell CeO2@C nanospheres as enhanced anode materials for lithium ion batteries
Source: Royal Society of Chemistry journal article supplement (doi:10.1039/c3ta15420c), 2014-01-01
Supplement: c3ta15420c1.pdf [file c3ta15420c1.pdf]

## **Supporting Information for:**

# **Core-shell CeO<sub>2</sub>@C Nanospheres as Enhanced Anode Materials for Lithium Ion Batteries**

**Xiaoyun Wu<sup>a</sup>, Helin Niu<sup>\*a</sup>, Shasha Fu<sup>a</sup>, Jiming Song<sup>a</sup>, Changjie Mao<sup>a</sup>, Shengyi Zhang<sup>a</sup>, Dawei Zhang<sup>b</sup>, and Changle Chen<sup>c</sup>**

### **Structure and morphology characterization of products**

Crystallographic phases of all the products were investigated by powder X-ray diffraction (XRD, X'pert PRO SUPER, Cu K $\alpha$  radiation,  $\lambda=1.54056$  Å). Morphologies of samples were examined by field-emission scanning electron microscopy (FESEM, FEI Sirion 200) and transmission electron microscopy (TEM; Hitachi H-800). Thermogravimetric analysis and differential scanning calorimetry (TGA–DSC) were used to test the weight loss of the products. TGA–DSC data was recorded with a thermal analysis instrument (WCT-1D BOIF) under an airflow or N<sub>2</sub> atmosphere at the heating rate of 10 °C/ min from the room temperature to 800 °C. Infrared spectra were measured on the Fourier infrared spectrum instrument (Nicolet Magna-IR 870).

### **Electrochemical measurements**

The electrochemical performances of the cerium oxides samples as the electrode materials were evaluated using a coin cells (CR2032) with the structure of the Li | 1M LiPF<sub>6</sub> (EC:DEC=1:1) | CeO<sub>2</sub>@C. The CeO<sub>2</sub>@C electrodes were prepared as 14 mm diameter pellets by casting a slurry

consisting of 80 wt% active oxide, 10 wt% poly(vinylidene fluoride) (PVDF) binder, and 10wt% acetylene black onto a piece of copper foil. Celgard 2400 microporous polypropylene membrane was used as a separator. These cells were cycled galvanostatically between 0.0 and 3.0 V at room temperature on a multi-channel battery test system (NEWARE BTS-610). The current density was 0.2 C. Cyclic voltammogram (CV) was also performed on a CHI 604a Electrochemical Workstation to identify the electrochemical reactions of CeO<sub>2</sub>@C electrodes. The scanning rate was 0.2 mV·s<sup>-1</sup>.
